# Characterization of a Stable, Metronidazole-Resistant *Clostridium difficile* Clinical Isolate

Tarah Lynch<sup>1</sup>, Patrick Chong<sup>1</sup>, Jason Zhang<sup>1</sup>, Romeo Hizon<sup>1</sup>, Tim Du<sup>1</sup>, Morag R. Graham<sup>1</sup>, Daniel R. Beniac<sup>1</sup>, Timothy F. Booth<sup>1</sup>, Pamela Kibsey<sup>2</sup>, Mark Miller<sup>3</sup>, Denise Gravel<sup>4</sup>, Michael R. Mulvey<sup>1\*</sup>, Canadian Nosocomial Infection Surveillance Program (CNISP)<sup>1</sup>

**1** National Microbiology Laboratory, Public Health Agency of Canada, Winnipeg, Manitoba, Canada, **2** Victoria General Hospital, Victoria, British Columbia, Canada, **3** Jewish General Hospital, Montreal, Quebec, Canada, **4** Public Health Agency of Canada, Ottawa, Ontario, Canada

## Abstract

**Background:** *Clostridium difficile* are Gram-positive, spore forming anaerobic bacteria that are the leading cause of healthcare-associated diarrhea, usually associated with antibiotic usage. Metronidazole is currently the first-line treatment for mild to moderate *C. difficile* diarrhea however recurrence occurs at rates of 15–35%. There are few reports of *C. difficile* metronidazole resistance in the literature, and when observed, the phenotype has been transient and lost after storage or exposure of the bacteria to freeze/thaw cycles. Owing to the unstable nature of the resistance phenotype in the laboratory, clinical significance and understanding of the resistance mechanisms is lacking.

**Methodology/Principal Findings:** Genotypic and phenotypic characterization was performed on a metronidazole resistant clinical isolate of *C. difficile*. Whole-genome sequencing was used to identify potential genetic contributions to the phenotypic variation observed with molecular and bacteriological techniques. Phenotypic observations of the metronidazole resistant strain revealed aberrant growth in broth and elongated cell morphology relative to a metronidazole-susceptible, wild type NAP1 strain. Comparative genomic analysis revealed single nucleotide polymorphism (SNP) level variation within genes affecting core metabolic pathways such as electron transport, iron utilization and energy production.

**Conclusions/Significance:** This is the first characterization of stable, metronidazole resistance in a *C. difficile* isolate. The study provides an in-depth genomic and phenotypic analysis of this strain and provides a foundation for future studies to elucidate mechanisms conferring metronidazole resistance in *C. difficile* that have not been previously described.

**Citation:** Lynch T, Chong P, Zhang J, Hizon R, Du T, et al. (2013) Characterization of a Stable, Metronidazole-Resistant *Clostridium difficile* Clinical Isolate. PLoS ONE 8(1): e53757. doi:10.1371/journal.pone.0053757

**Editor:** Axel Cloeckert, Institut National de la Recherche Agronomique, France

**Received:** September 5, 2012; **Accepted:** December 4, 2012; **Published:** January 17, 2013

**Copyright:** © 2013 Lynch et al. This is an open-access article distributed under the terms of the Creative Commons Attribution License, which permits unrestricted use, distribution, and reproduction in any medium, provided the original author and source are credited.

**Funding:** No external funding sources were received for this study. This project was funded solely by the Public Health Agency of Canada. The funders had no role in study design, data collection and analysis, decision to publish, or preparation of the manuscript.

**Competing Interests:** The authors have declared that no competing interests exist.

\* E-mail: Michael\_mulvey@phac-aspc.gc.ca

† Membership of the Canadian Nosocomial Infection Surveillance Program (CNISP) is provided in the Acknowledgments.

## Introduction

*Clostridium difficile* infection (CDI) is the most common cause of healthcare-associated infectious diarrhea. Disease severity can range from self-limiting diarrhea to pseudomembranous colitis which can be associated with additional complications leading to increased mortality rates [1,2]. Prevalence of CDI has increased dramatically with emergence of the hypervirulent NAP1/027 (North American pulse-field type 1, PCR ribotype 027) strain in 2003 [3–6]. Laboratory diagnosis involves detection of toxin A and B in stool samples by enzyme immunoassay and/or molecular detection [7]. Stool culture remains the most sensitive diagnostic however owing to the slow turnaround time it is more often used for epidemiological studies rather than patient diagnosis [7]. Antibiotic susceptibility testing on *C. difficile* is not routinely performed since the assay is too time consuming. The Clinical Laboratory Standards Institute (CLSI) susceptibility breakpoints are based on therapeutic levels in the serum and not the intestinal

lumen (site of action) and there is poor correlation between *in vitro* susceptibility and *in vivo* efficacy [8].

Metronidazole is the recommended treatment for mild to moderate CDI, while vancomycin is reserved for more severe cases owing to cost and concerns of vancomycin-resistant nosocomial infections [9,10]. Fidaxomicin is a new class of narrow spectrum macrocyclic antibiotics recently licensed for treatment of CDI but is not yet widely used [11]. The pressure to develop alternative therapies for CDI stems from the incidence of disease recurrence that can follow treatment with metronidazole, vancomycin or fidaxomicin (15–35%) [9,11–13] and the fear that development of resistance to one of more of these agents will limit our ability to treat CDI.

Recent studies support the general assumption that most *C. difficile* isolates remain susceptible to vancomycin and metronidazole [14–17] however metronidazole and vancomycin resistance has been reported [18–21]. A study from Spain in 2002 reported 3.1% of *C. difficile* isolates with intermediate resistance to

vancomycin and 6.3% to metronidazole (MIC value  $\geq 16$  mcg/ml breakpoint) [22]. Such reports of metronidazole resistance in *C. difficile* have all observed loss of the resistant phenotype after passaging or low temperature storage [19,23,24]; moreover, there was only one study that found resistance in epidemic, NAP1/027-typed isolates [20]. The transient nature of the resistant phenotype has made further investigation of metronidazole resistance mechanisms difficult to pursue in *C. difficile*.

Metronidazole resistance mechanisms have been extensively investigated in other pathogenic bacteria such as *Bacteroides fragilis* and *Helicobacter pylori* [25–28]. Multiple metronidazole resistance mechanisms have been described, even within a single bacterial species. For example, mechanisms described for *B. fragilis* include the presence of *nim* genes, which encode 5-nitroimidazole reductases that convert metronidazole to a non-toxic amino derivative [29–31], overexpression of the DNA repair protein, RecA [28] and disruption of the electron transport chain [32]. Similarly, mechanisms in *H. pylori* that potentially contribute to metronidazole resistance have been described involving mutations in the *rdxA* and *frxA* nitroreductase genes [33–35] and also overexpression of *recA* [36]. Additionally, overexpression of the *hefA* bacterial efflux pump [37] and mutations within the ferric uptake regulator (*fur*) gene, which is responsible for responding to reactive oxygen species and iron uptake [25,38] have also been reported to confer metronidazole resistance in *H. pylori*.

In 2009, our laboratory isolated a *C. difficile*, NAP1 strain displaying metronidazole resistance (MIC > 32 mcg/ml). After passaging the isolate on media containing sub-inhibitory concentrations of metronidazole (8 mcg/ml), we successfully cultured a stably maintained isolate with the resistant phenotype notably present after freeze-thawing (in contrast to prior reports in which the metronidazole resistance phenotype was lost after freezing or cold storage). To investigate further, we sequenced the genome of the stable-metronidazole resistant isolate as well as a second sub-population from the same clinical sample that had reverted after freezer storage to become only partially susceptible to metronidazole. The aim of the current work is to present an initial genomic and phenotypic characterization of the metronidazole-resistant and reduced susceptible isolates in the pursuit of elucidating the resistance mechanisms and potential clinical implications associated with *C. difficile* metronidazole resistance.

## Materials and Methods

### Strain Isolation

Strain CD26A54 was isolated from a stool sample collected under the Canadian Nosocomial Surveillance Program (CNISP) which continuously monitors health-care acquired infections across Canada. Data collection was observational and considered a routine component of institutional infection prevention and control practices under provincial legislation, therefore informed consent was not required [39]. CNISP collected data indicated the patient received standard metronidazole treatment however multiple courses were administered due to recurrent CDI.

The stool sample was processed as previously described [40] however, beginning in 2009, suspensions were also planted on *C. difficile*-moxalactam-norfloxacin (CDMN) agar (OXOID, Nepean, ON, Canada) supplemented with 8 mcg/ml metronidazole as an additional screen for potential metronidazole resistance. Growth was observed on the CDMN+metronidazole plate after anaerobic incubation for 48 hours at 35–37°C. A colony was passaged onto Brucella agar supplemented with 10 mcg/ml vitamin K, 5 mcg/ml haemin, 5% laked sheep blood (BAKHS; BD, Mississauga, ON, Canada)+8 mcg/ml metronidazole. A sub-population from

this plate was stored at  $-80^{\circ}\text{C}$  while the other sub-population was further passaged on BAKHS+8 mcg/ml metronidazole (approximately 12 passages). The subpopulation that was immediately frozen subsequently tested susceptible to metronidazole (although slightly elevated MIC compared to wild type *C. difficile* isolates regularly tested in our laboratory) and was designated as CD26A54\_S (Susceptible), while the subpopulation that was continually passaged on metronidazole-containing agar retained the resistant phenotype even after the freeze-thaw process, it is referred to herein as CD26A54\_R (Resistant).

The NAP1 *C. difficile* strain, VLOO13 was used as a control strain in the present experiments. Our laboratory confirmed that VLOO13 had an indistinguishable NAP1 PFGE pattern and toxin genotype to the CD26A54\_R and CD26A54\_S isolates, while being geographically unrelated, and has also never demonstrated reduced susceptibility to metronidazole. VLOO13 was provided in kind by Dr. T. Louie (University of Calgary, Calgary, Canada).

### Molecular characterization of *C. difficile*

DNA for PCR analysis was prepared using InstaGene Matrix (Bio-Rad, Richmond, CA, USA). Multiplex PCR was employed to detect the Toxin A (*tcdA*), Toxin B (*tcdB*), Binary toxin (*cdtB*), the negative regulator of toxin production (*tcdC*) and the triose phosphate isomerase (*tpi*) genes [41,42].

Pulsed-field gel electrophoresis (PFGE) typing was performed with *SmaI*-digested DNA following a validated protocol found elsewhere [43]. BioNumerics software version 4.0 (Applied Maths, Austin, TX, USA) was used to analyze and compare the gel images. Cluster analysis parameters included the Dice coefficient and the unweighted-pair group method with arithmetic means [20]. Isolates that produced PFGE patterns with at least 80% homology were considered to be within the same PFGE type [20].

### Culturing methods and quantitation

All experiments were performed on strains that had been passaged three times on BAKHS agar after being removed from  $-80^{\circ}\text{C}$  storage to maintain consistency between technical replicates. Growth curves were performed in Brain Heart Infusion (BHI) broth (BD, Mississauga, ON, Canada) at 37°C in an anaerobic chamber (Coy Laboratory Products Inc, Grass Lake, MI). The turbidity for all overnight starter cultures was measured with a spectrophotometer (Eppendorf, Mississauga, ON, Canada) at OD 600 nm and normalized before inoculating fresh growth curve tubes to minimize variation at time point 0. Quantitation of vegetative cells relative to spores was performed following a protocol described elsewhere [44] using alcohol shock to select for spores and subsequent serial dilutions and enumeration on CDMN agar.

### *C. difficile* preparation for scanning electron microscopy

All samples were filtered using 13 mm diameter SPI-pore polycarbonate track etch filters with 100 nm pores (SPI supplies, West Chester, Pennsylvania, USA), held in 13 mm Swinnex<sup>®</sup> filter holders (Millipore, Billerica, Massachusetts, USA). All syringe filtering was performed using a Legato 200 syringe pump (KD Scientific, Holliston, Massachusetts, USA) operated with a flow rate of 1 ml/minute to ensure reproducible filtration conditions. When starting with fresh bacterial samples grown on agar plates, two loopfuls of bacteria were mixed in 800  $\mu\text{l}$  of fixative (1% paraformaldehyde, 2% glutaraldehyde) generating a turbid suspension. The subsequent filter preparation of all the specimens was done in a fume hood, using Lure-Lok<sup>®</sup> syringes to pass all fluids through the filter assembly. Sample processing was conducted as follows: using a 2 ml syringe, 2 ml of PBS was

passed through the apparatus to wet the filter. Next, 0.2 ml of the bacterial suspension was applied to the filter using a 1 ml syringe, followed by a 5 ml wash with PBS done using a 5 ml syringe. Then using 2 ml syringes, the filter was washed with 2 ml 50% ethanol, 2 ml 70% ethanol, 2 ml 85% ethanol, 2 ml 95% ethanol, and 2 ml 100% ethanol. The filter apparatus was then disassembled and the filter was allowed to air dry.

Once dry, the filter was cut and mounted onto an SEM stub. First, a double-sided adhesive carbon disc was stuck to the metal stub, and then the filter was mounted to the carbon disc, bacteria side up. Silver flash paint was then used to create a conductive contact between the stub and the filter paper. 1 cm of 0.2 mm diameter gold wire was measured, cut and wound on the filament of an Agar 208 Turbo Carbon Coater evaporator unit (Agar Scientific, Stansted, England). The vacuum was turned on, and once a vacuum was generated the low tension was gradually increased to evaporate the gold onto the sample.

Specimens were imaged in a Scanning Electron Microscope (JEOL CarryScope, JEOL Ltd., Tokyo, Japan) operated at 6 kV, with a spot size of 20, a 9 mm working distance, and at nominal instrument magnification of  $\times 3,000$ . Digital images were acquired using the secondary electron detector.

*C. difficile* length measurements ( $n \approx 1000$ /dataset) were made using the Image J software package [45]. Using the segmented line tool, and the analyze/measure function for all of the SEM images of *C. difficile*. The measurements that were made in image J were then collated, analyzed, and plotted, using Microsoft Excel.

### Antimicrobial susceptibility testing

Susceptibility to metronidazole, clindamycin, vancomycin, rifampicin, moxifloxacin and tigecycline were performed using Etest® strips (bioMérieux, Solna, Sweden) with standard methods described elsewhere [46]. Briefly, the standard protocol involved BAKHS agar plates, incubated for 48 hours at 37°C under anaerobic conditions. Additional susceptibility testing to metronidazole by agar dilution was performed on the original isolate from stool to confirm the Etest® results. Results are reported as minimum inhibitory concentrations (MIC) in mcg/ml of the antibiotic being tested. Best efforts were made to ensure reproducibility of the Etest® assays by consistently testing strains at the same passage number, using BAKHS agar plates within 2 weeks of production and maintaining a proper anaerobic environment with an O<sub>2</sub>/H<sub>2</sub> gas analyzer (COY Laboratory Products, Grass Lake, Michigan, USA) installed in the anaerobic chamber. As per CLSI guidelines, control ATCC strains were always used in parallel with test samples to validate our results [46].

To test for heteroresistance towards metronidazole, Etest® assays were again set up according to the manufacturer's instructions, however they were incubated for an extended period of time to observe the presence or absence of slower growing satellite colonies within the clear ellipse. A similar protocol has been described previously [23], however the incubation time was modified as we empirically established that 96 hours incubation was sufficient to determine heteroresistance; longer time points (up to 10 days) did not reveal new colonies in our laboratory.

### Whole-genome sequencing (WGS)

Draft genomes were acquired for the CD26A54\_R and CD26A54\_S isolates via combined use of single-end shotgun pyrosequencing reads (GS FLX-Titanium; Roche Diagnostics, Indianapolis, IN, USA) and paired-end, 100 bp Illumina reads (GAIIe; Illumina, San Diego, CA, USA; Sequenced at Eurofins MWG Operon, Huntsville, AL, USA). Pyrosequencing yielded an

average 22X and 24X coverage while the Illumina data increased the coverage to 228X and 323X average coverage of the CD26A54\_S and CD26A54\_R genomes, respectively. The combined sequence data provided an estimated >99% coverage of each genome. Publically available NAP1 genomes were employed for comparative genomic analyses with the CD26A54\_R and CD26A54\_S strains [47,48] (Table 1).

### Bioinformatic analyses

GS-FLX reads were assembled *de novo* using Newbler version 2.5.3 (Roche Diagnostics). The Illumina GAIIe reads were then mapped to the Newbler assembled GS FLX contigs to correct potential homopolymer errors using CLC Genomics Workbench version 4.9. The resultant contigs were then ordered using the NAP1 reference sequence R20291 (GenBank: NC\_013316.1 [48]) and some gap closure was completed by integration of PCR-generated products using Staden Gap4 software [49]. These ordered contigs were connected with a linker sequence containing stop codons in all 6 translation reading frames creating high quality pseudogenomes for annotation and further downstream analyses. Automated annotation was accomplished using an in-house, modified version of GenDB version 2.2 [50].

CD26A54\_R and CD26A54\_S were compared with other publically available NAP1 strains by generating a BLAST atlas (listed in Table 1). BLASTn was run with an expected cutoff value of  $1 \times 10^{-10}$  and a percent identity cutoff value of 80% for all nucleotide segments greater than 100 bp and the results visualized in GView [51]. Analysis for single nucleotide polymorphisms (SNP) and insertion/deletion (indel) mutations were performed using BWA version 6.1 [52] to map the Illumina GAIIe reads to the R20291 reference sequence followed by data parsing of the alignments (SAMtools version 1.18; [53]) and variant calling with VCFtools version 1.8 [54].

### Statistical Analysis

Growth curves were analyzed with a two-way ANOVA and Tukey posttest. The Kruskal-Wallis test for variance with Dunn's posttest was used to analyze the SEM length measurement and metronidazole MIC data as normality could not be assumed for these distributions. All analyses were conducted in PRISM 5 statistical software (GraphPad Software, La Jolla, CA, USA).

## Results

### Molecular identification of the study strains

All three strains in the study, CD26A54\_R, CD26A54\_S and VLOO13 were typed as NAP1, pattern 001 by pulse-field gel electrophoresis (PFGE). The PCR toxin analyses were typical of NAP1 strains, being positive for all toxins (*tcdA*, *tcdB*, *cdtB*), the *tpi* and *tcdC* genes, with the characteristic 18 bp deletion in the *tcdC* gene [55]. CD26A54\_R, CD26A54\_S and VLOO13 were indistinguishable by these standard typing methods. Both CD26A54 subpopulations were considered clonal, as they originated from a colony isolated from a single stool sample despite having subsequent divergent environmental exposures. Specifically, the CD26A54\_S subpopulation was immediately frozen after isolation causing this strain to subsequently become susceptible to metronidazole under standard laboratory conditions. In contrast, CD26A54\_R was continually passaged in the presence of selective antibiotic pressure, likely causing adaptive changes that made it stably resistant to metronidazole.

**Table 1.** Summary of genomes used in comparative analyses.

| Strain    | Year | Location     | Source | Assembly | Genome size (nt) | No. of contigs | Reference  | NCBI accession |
|-----------|------|--------------|--------|----------|------------------|----------------|------------|----------------|
| CD26A54_R | 2009 | B.C., Canada | Human  | draft    | 4,166,900        | 4              | this study | PRJNA172829    |
| CD26A54_S | 2009 | B.C., Canada | Human  | draft    | 4,166,979        | 6              | this study | PRJNA172828    |
| QCD-66c26 | 2007 | QC, Canada   | Human  | draft    | 4,094,363        | 32             | 44         | NZ_CM000441    |
| R20291    | 2006 | UK           | Human  | complete | 4,191,339        | 1              | 45         | NC_013316      |
| QCD-37×79 | 2005 | ON, Canada   | Human  | draft    | 4,092,698        | 45             | 44         | NZ_CM000658    |
| QCD-97b34 | 2004 | Nfld, Canada | Human  | draft    | 3,998,408        | 60             | 44         | NZ_CM000657    |
| QCD-32g58 | 2004 | QC, Canada   | Human  | draft    | 4,109,689        | 16             | 44         | NZ_CM000287    |
| BI-1      | 1988 | USA          | Human  | draft    | 4,118,573        | 66             | 44         | NC_017179      |
| CD196     | 1985 | France       | Human  | complete | 4,110,554        | 1              | 45         | NC_013315      |

doi:10.1371/journal.pone.0053757.t001

### Growth differences of CD26A54\_R compared to CD26A54\_S and VLOO13

CD26A54\_R was observed to have a significantly reduced cell density in BHI broth compared to VLOO13 at all time points from 5–24 hours growth ( $p < 0.05$ ) as well as CD26A54\_S from 7–11 hours ( $p < 0.05$ ). In contrast, there was no significant difference between the growth of CD26A54\_S and VLOO13 throughout the entire time course (Figure 1).

When grown on standard BAKHS agar plates, all three *C. difficile* strains used in the study demonstrated similar colony size variability at 48 hours. Attempts were made to separate the colonies by size to differentiate characteristics potentially associated with colony dimensions, however size variability was still observed regardless of the original single colony selected (unpublished data).

The quantitation of spores relative to vegetative cells within BHI broth was performed at 12, 24 and 48 hours post inoculation. Experimental optimization of the spore enumeration protocol was attempted using different shocking methods to select for spores and various media formulations for colony recovery. The cell quantities were inconsistent using these different methods, however a consistent trend was observed. Specifically, the relative percentage of spores increased for CD26A54\_S and VLOO13, but remained at or near zero for the metronidazole resistant strain, CD26A54\_R. The relative percentage of spores increased over time for both CD26A54\_S (1.4%, 12.0%, 42.2%) and VLOO13 (3.2%, 21.7%, 87.2%) at 12, 24 and 48 hours, respectively. Conversely, the percentage of spores in the CD26A54\_R culture remained at or near zero (0%, 0.0025%, 0%) for all three time points, respectively.

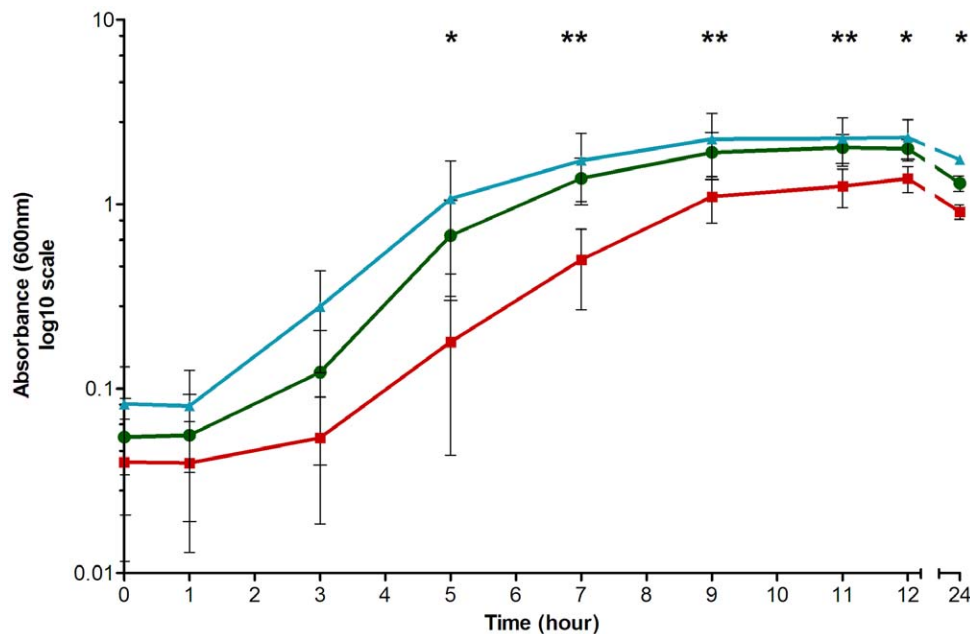

**Figure 1. Growth of *C. difficile* in BHI broth.** CD26A54\_R, the metronidazole resistant strain (□) demonstrated aberrant growth compared to VLOO13 (□) at all time points between 5 and 24 hours ( $p < 0.05^*$ ). However, the CD26A54\_S strain (□) only had a significantly greater cell density than CD26A54\_R during late-log and early stationary time points (7–11 hours,  $p < 0.05^{**}$ ). There was no significant difference observed between VLOO13 and CD26A54\_S throughout the growth curve. doi:10.1371/journal.pone.0053757.g001

### Bacterial ultrastructure was altered in both CD26A54 strains

Bacterial ultrastructure was examined by scanning electron microscopy (SEM). The results of this analysis are presented in Figure 2. The initial survey of these images revealed that wild type strain VLOO13 (panel A) bacilli were visibly shorter than the CD26A54\_S (panel B) and CD26A54\_R (panel C) strains of *C. difficile*. However, statistical comparison of computed bacterial lengths by Kruskal-Wallis ranked sum test revealed all three strains significantly differed from each other ( $p < 0.0001$ ). Length of the bacilli were measured, with the results presented as (median  $\pm$  interquartile difference); CD26A54\_R ( $4.0 \pm 2.1 \mu\text{m}$ ,  $N = 1004$ ), CD26A54\_S ( $3.6 \pm 2.1 \mu\text{m}$ ,  $N = 1002$ ) and VLOO13 ( $2.8 \pm 0.9 \mu\text{m}$ ,  $N = 1021$ ). All strains tested had the same approximate diameter, suggesting no differences in cell wall thickness. These results are plotted as a histogram in Figure 2 (panel D). The data suggest that both CD26A54\_R and CD26A54\_S populations contain shorter single cells comparable to VLOO13 in addition to longer bacilli, which appeared to be adjoining cells that have not separated properly. The septum can be visualized at intervals within these long structures (arrows in panel B and C).

### The CD26A54 strains are resistant to multiple antibiotics

Following the isolation of *C. difficile* from the stool sample, the MIC value of strain CD26A54 to metronidazole was 256 mcg/ml by agar dilution and 32 mcg/ml by Etest<sup>®</sup>. Retesting of the subpopulation that was immediately frozen, CD26A54\_S demonstrated an MIC of 2 mcg/ml towards metronidazole (by Etest<sup>®</sup>) while the strain that had been perpetually maintained on BAKHS+8 mcg/ml metronidazole had an MIC value of 32 mcg/ml.

Antibiotic susceptibility for a panel of 6 antibiotics was performed on the CD26A54\_R, CD26A54\_S and VLOO13

strains by Etest<sup>®</sup> strip (Table 2). The full panel of antibiotic susceptibilities was performed in duplicate, while metronidazole susceptibility was tested in 11 independent experiments. Quality control MIC values (ATCC control strains) were consistently within acceptable range for all susceptibility experiments. Based on the interpretive criteria for resistance provided by the Etest<sup>®</sup> manufacturer's guidelines, all three strains, CD26A54\_S, CD26A54\_R and VLOO13 were resistant to moxifloxacin ( $\text{MIC} > 32 \text{ mcg/ml}$ ) while only CD26A54\_R and CD26A54\_S were above the resistant breakpoint for clindamycin ( $\text{MIC} = 8$  and  $\text{MIC} = 6 \text{ mcg/ml}$ , respectively). All three strains tested were susceptible to vancomycin, rifampicin and tigecycline.

Figure 3 illustrates the results of  $n = 11$  independent metronidazole Etest<sup>®</sup> assays that were conducted prior to all experiments performed to monitor variation and stability of metronidazole susceptibility. Using the Kruskal-Wallis ranked sum test, the median MIC of CD26A54\_R was significantly greater compared to CD26A54\_S and VLOO13 ( $p < 0.001$ ). The range of MIC values for CD26A54\_R was 12–256 mcg/ml, spanning 4 doubling dilutions, with the median and mode (most frequent value) being 96 mcg/ml. The CD26A54\_S MIC range was 0.75–12 mcg/ml (3 doubling dilutions), with both the median and mode being 2 mcg/ml. A single MIC value of 12 mcg/ml for CD26A54\_S was observed and considered to be an outlier. This value was not excluded as the control strain was within acceptable range and the two remaining test strains demonstrated typical results (compared to other replicates) however this elevated MIC was not reproducible. The range of the wild type, VLOO13 strain was much smaller, only spanning 2 doubling dilutions, 0.38–1.5 mcg/ml; the median and mode were both 0.38 mcg/ml. The control strain, *B. fragilis* consistently tested within CLSI acceptable limits with a range of 0.19–0.25 mcg/ml. It is unclear at this time why there were varying ranges of MIC values as all efforts were made to

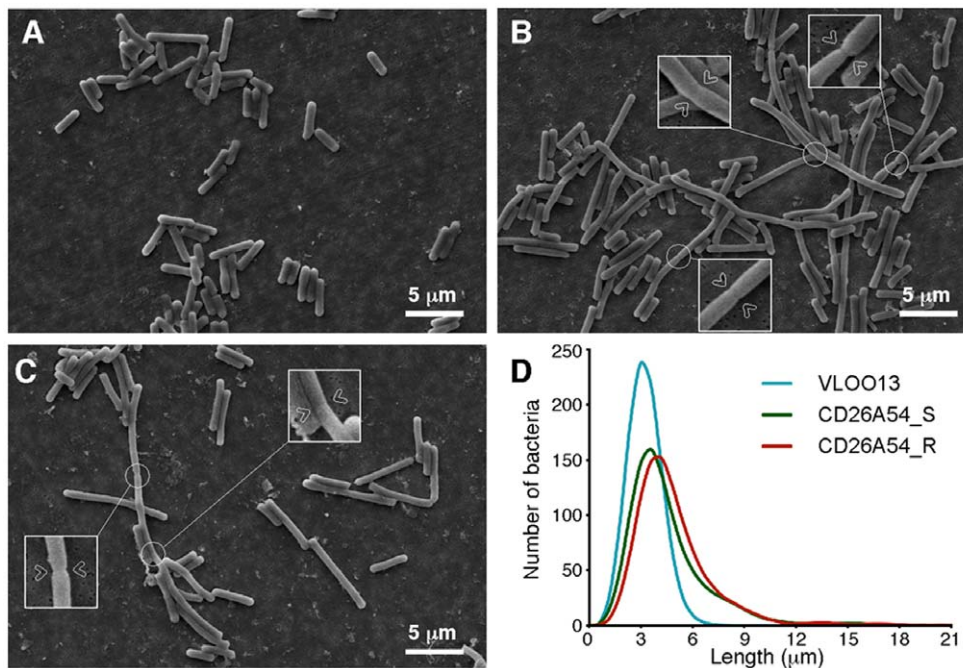

**Figure 2. Scanning electron microscopy of *C. difficile*.** SEM images of VLOO13 (A), CD26A54\_S (B) and CD26A54\_R (C). (D) Histograms of calculated bacterial length are presented; they demonstrate the cell length variation that exists across the three *C. difficile* specimens that were imaged by SEM. The insets with arrows in panels (B, C) highlight the septum which partially forms between adjacent cells. Cell separation appears to be impaired resulting in the longer phenotype.

doi:10.1371/journal.pone.0053757.g002

**Table 2.** Antibiotic susceptibility results of *C. difficile* strains by Etest®.

| Strain                       | Metronidazole | Clindamycin | Vancomycin | Rifampicin | Moxifloxacin | Tigecycline |
|------------------------------|---------------|-------------|------------|------------|--------------|-------------|
| CD26A54_R                    | 12–256        | 8           | 0.75       | 0.003      | >32          | 0.094       |
| CD26A54_S                    | 2–12          | 6           | 0.75       | 0.004      | >32          | 0.125       |
| VLOO13                       | 0.38–1.5      | 2           | 0.75       | 0.004      | >32          | 0.125       |
| <i>B. fragilis</i> ATCC25285 | 0.19–0.25     | 1.5         | N/A        | N/A        | 0.38         | N/A         |
| <i>E. faecalis</i> ATCC29212 | N/A           | N/A         | 4          | 1.5        | N/A          | 0.75        |
| <i>S. aureus</i> ATCC29213   | N/A           | N/A         | 2          | N/A        | N/A          | N/A         |
| <i>E. coli</i> ATCC25922     | N/A           | N/A         | N/A        | N/A        | 0.064        | N/A         |

N/A = not applicable as a quality control strain for this specific antibiotic.  
doi:10.1371/journal.pone.0053757.t002

ensure consistent strain handling protocols and environmental conditions.

### The heteroresistant phenotype towards metronidazole was observed for both CD26A54 subpopulations

We examined heteroresistance towards metronidazole using Etest® strips. At 48 hours, the CD26A54\_R strain was classified above the resistant breakpoint (MIC = 32 mcg/ml). Under prolonged incubation for 96 hours, we observed further growth leading to reduction of the ellipse (MIC = 96 mcg/ml). The CD26A54\_S isolate was susceptible to metronidazole at 48 hours (MIC = 3 mcg/ml), however slower growing colonies were

observed within the ellipse increasing the MIC to 16 mcg/ml at 96 hours. The wild type VLOO13 strain, demonstrated MIC values within the same doubling dilution at both 48 and 96 hours, MIC = 0.38 mcg/ml and 0.5 mcg/ml respectively. The *B. fragilis* control strain MIC values were unchanged between 48 and 96 hours, the MIC values were 0.19 mcg/ml at both time points.

### Genetic macrodiversity observed between sequenced NAP1 strains

The macrodiversity of the CD26A54\_R and CD26A54\_S strains were compared to publically available NAP1 genomes using BLASTn to generate a BLAST atlas (Figure 4). Of particular

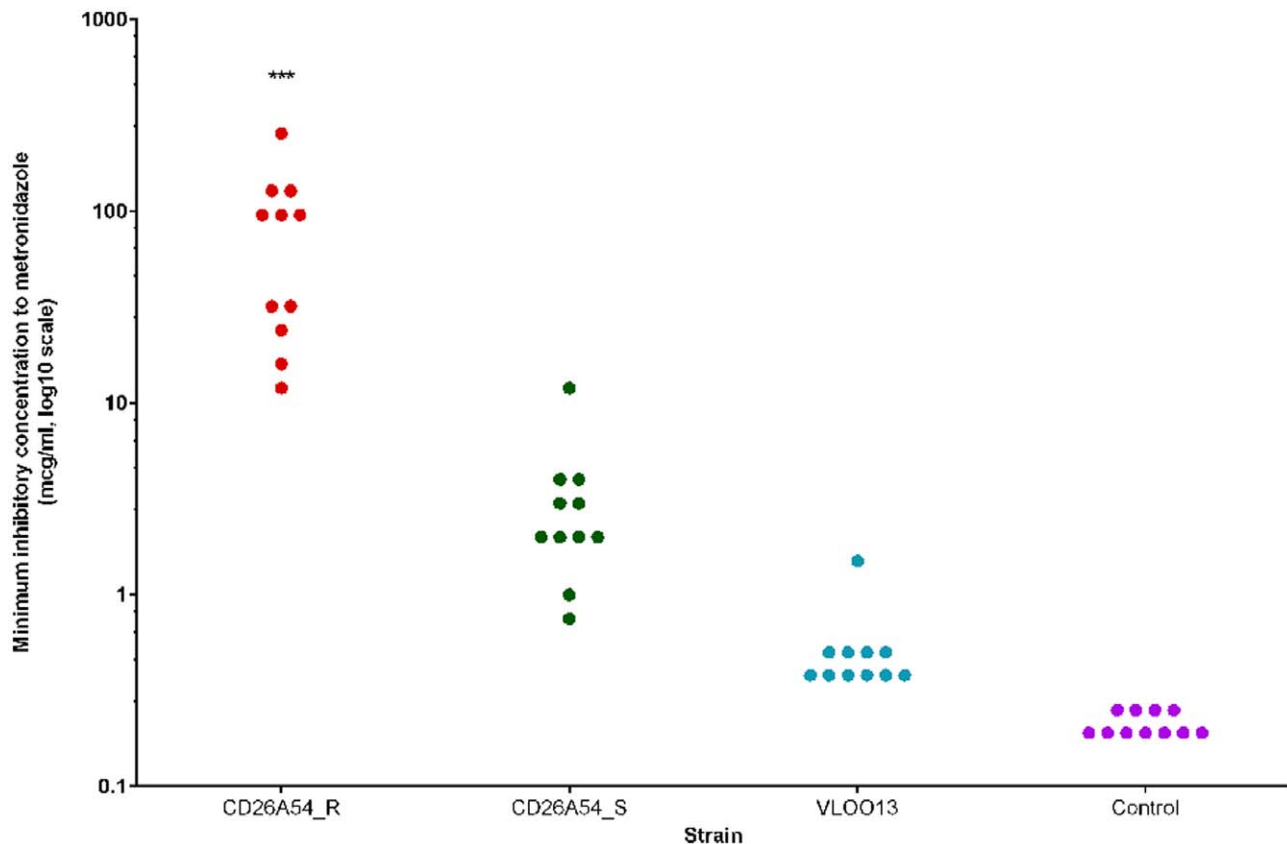

**Figure 3. Summary of metronidazole susceptibility results by Etest®.** Susceptibility to metronidazole was repeatedly tested for a total of  $n = 11$  independent experiments to monitor the stability of the resistance phenotype.  
doi:10.1371/journal.pone.0053757.g003

interest is a region with elevated GC content located just above 2000 kbp which represents the location of four previously identified putative conjugative transposons [56]. The two inner purple rings represent BI-1 and CD196, representing NAP1 strains pre-dating the epidemic NAP1 spread which began in 2003. These two strains are missing all four transposons within this region whereas the other 6 strains, (representing Canadian, post-epidemic NAP1 isolates) are only missing two transposons, Tn6104 (15.6 kbp) and Tn6106 (11.3 kbp) (displayed as 2 blocks in the outermost ring in brown) relative to the mapping reference genome R20291. The absence of these two transposons from the publically available NAP1 genomes from Quebec (4 blue concentric rings) has been shown previously [56]. Importantly, this analysis revealed that there was no gain or loss of mobile genetic elements unique to the CD26A54\_R strain and that loss of Tn6104 and Tn6106 is common amongst Canadian NAP1 strains from both British Columbia and Quebec. As metronidazole resistance was not reported for any of the publically available genomes included in this study [48,57,58], we infer that the metronidazole resistant phenotype observed with the CD26A54\_R strain did not result from recently acquired or excised genomic content.

### Genetic variation between CD26A54\_S and CD26A54\_R is at the SNP level

There were 64 total variants identified for the CD26A54\_R strain compared to only 45 total variants of the CD26A54\_S strain, each in relation to the publically available reference R20291 (NC\_013316.1) genome. There were 20 variants, unique to CD26A54\_R within CDS (coding DNA sequence) including 17 SNP and 3 indel while CD26A54\_S only contained 3 variants, 2 SNP and 1 indel (Table 3). Additionally, there were 23 variants that were common to both CD26A54\_R and CD26A54\_S compared to the reference sequence, listed in Table 4. In both Tables 3 and 4, the variant confidence is shown in the last three columns with PCR sequence confirmation and/or Illumina coverage and frequency of the variant base call. PCR was performed on 8 genes of interest and included genomic DNA from VLOO13 for comparison. For all 8 genes, the VLOO13 nucleotide sequences were found to be 100% identical to as the reference R20291 sequence. It was observed that all indel variants caused coding frameshift mutations, which are more likely detected (than point mutations) to affect the protein function. Of particular interest were CDS variants in CD26A54\_R, located within a putative transcription antiterminator, an oxygen-independent coproporphyrinogen III oxidase gene (*hemN*), a putative N-acetylmuramoyl-L-alanine amidase gene and detected in CD26A54\_S in a GntR family transcriptional regulator. Additionally, there were frameshift mutations common to both strains in the anti-sigma factor (*rsbW*), an ATP-dependent helicase gene, a putative nitroreductase gene and a transcriptional regulator. The distinction between variants unique to each strain versus those common to both is noteworthy because although only CD26A54\_R is considered resistant by standard CLSI guidelines, CD26A54\_S does have reduced susceptibility towards metronidazole and both share phenotype differences which distinguish them from the VLOO13 wild type strain. There were also 21 and 19 intergenic variants discovered within the CD26A54\_R and CD26A54\_S strains, respectively, however these occurred  $\geq 100$  bp from any CDS; they were not listed in the Table 3 or 4.

Distribution of all detected variants (within CDS and intergenic) relative to R20291 are illustrated in Figure 5. The reference genome R20291 (NC\_013316.1) is denoted along the bottom with the CDS (black bars), GC content (pink track) and GC skew

(orange track) plotted. Most regions with elevated GC content (pink peaks) correspond to ribosomal coding regions with the exception of a large peak between 2000 kbp and 2250 kbp corresponding to the variably present four putative conjugative transposons [56]. Figure 5 reveals that the genetic variants of both strains are randomly distributed throughout the entire genome. Moreover, the CD26A54\_R isolate contained more variants, likely attributed to the extensive laboratory passaging of this isolate in the presence of sub-inhibitory metronidazole.

### Discussion

We have presented four phenotypes associated with the stable, metronidazole-resistant CD26A54\_R subpopulation: (i) aberrant growth in liquid media, (ii) attenuated cell wall separation (iii) lack of spore production by 48 hours and (iv) heteroresistance or more accurately, a slower growing subpopulation that increases the metronidazole MIC. By standard diagnostic methods CD26A54\_S is considered susceptible to metronidazole, however this strain shares some characteristics with its resistant counterpart, specifically attenuated cell separation and heteroresistance against metronidazole thus also distinguishing it from the wild type VLOO13. We will discuss how whole genome sequence data may explain these phenotypes however further investigation is needed to understand the role of these changes in metronidazole resistance and how this impacts pathogenicity.

In BHI broth, CD26A54\_R appeared to have a prolonged lag phase followed by reduced cell density, particularly during the late-log to early stationary phases. Even at 24 hours post-inoculation, CD26A54\_R never reached the same cell density as either CD26A54\_S or VLOO13. This may suggest CD26A54\_R encountered a nutrient limitation in the media that was not exogenously required by the other strains, enabling the other two to reach a higher cell density. Genetically, there are two variants that may have contributed to the aberrant growth observed, namely the frameshift mutation in the *hemN* gene, whose product is involved in haem biosynthesis and *thiH*, encoding a protein involved in thiamine biosynthesis. There are additional variants found in CD26A54\_R that are associated with electron transport, such as glycerol-3-phosphate dehydrogenase (*glyC*) and the pyruvate-flavodoxin oxidoreductase (*nifJ*). Disruption of electron transport alters both the energy production and intracellular redox potential which influence the efficiency of metronidazole entry and activation [59].

Deficiencies leading to disruptions in electron transport have been previously attributed to small colony variants (SCV) in other bacterial genera. Some general characteristics of SCV include smaller colonies on agar, slower growth, decreased respiration, attenuated cell separation and antibiotic resistance; additionally, they are often associated with persistent or recurrent infections [60]. We have observed by SEM that both CD26A54\_R and CD26A54\_S demonstrate elongated cells and incomplete cell separation which is similar to previous reports of *Enterococcus faecium* SCV [61,62] and *Staphylococcus aureus* SCV [63]. The shared characteristics of previously described SCV and the CD26A54 subpopulations such as aberrant growth, attenuated cell separation and antibiotic resistance have been demonstrated, however we have not observed smaller colonies on non-selective agar.

Resistance to additional antibiotics was tested to assess possible disruptions in metabolic pathways such as protein or cell wall biosynthesis that could contribute to altered cell morphology and aberrant growth however the MIC values of CD26A54\_R were similar to one or both of the metronidazole-susceptible strains. A high prevalence of moxifloxacin and clindamycin resistance

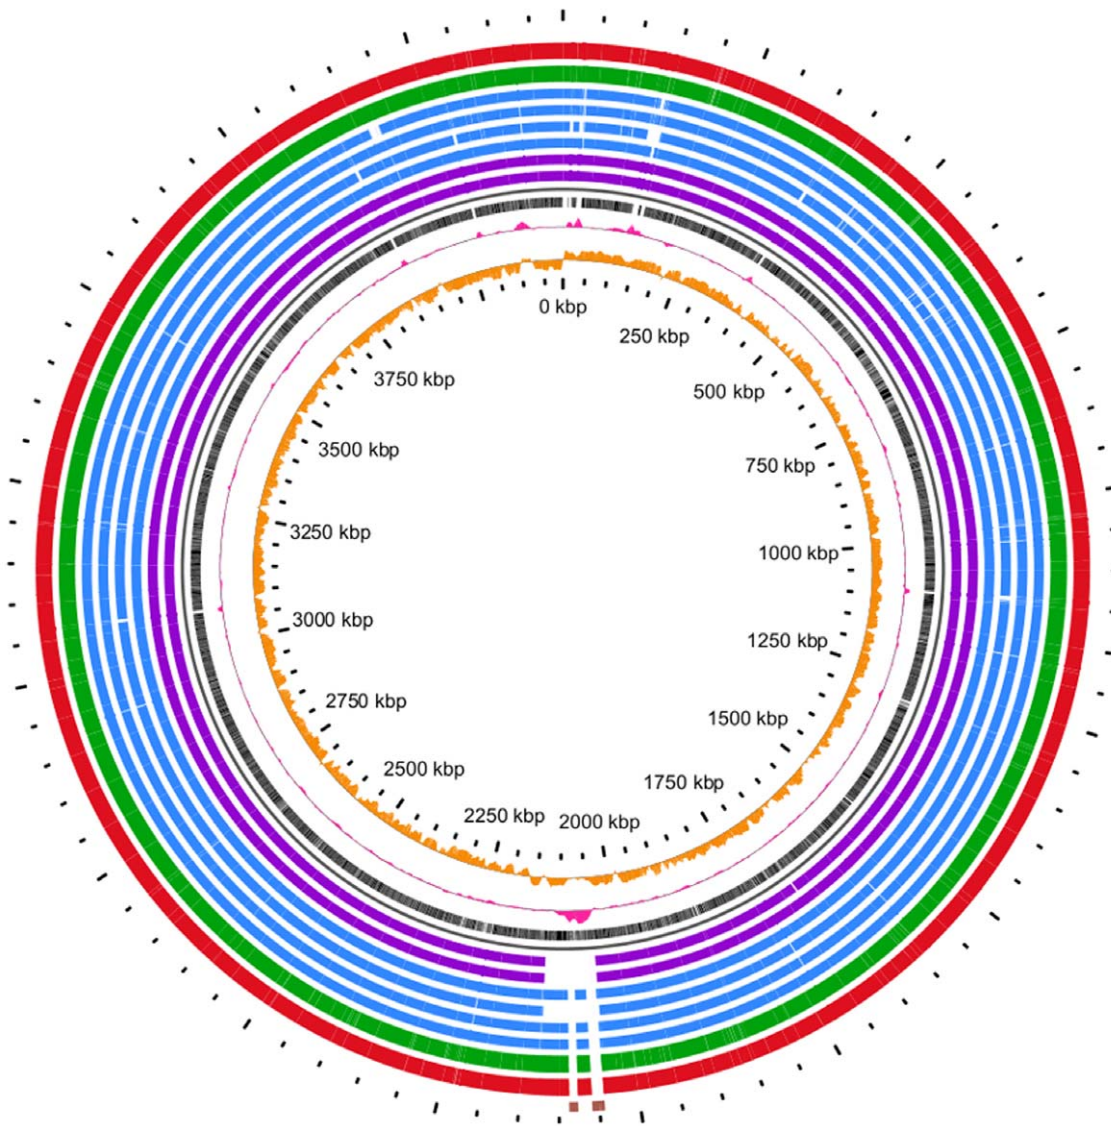

**Figure 4. BLAST atlas of NAP1 genomes.** BLASTn was used to compare NAP1 genomes listed in Table 1. The rings, listed from inner to outer tracks are as follows: Orange peaks represent GC skew while the pink peaks represent GC content. The innermost black track is the R20291 reference genome. Purple tracks are the historical, pre-epidemic strains, CD196 and BI-1. The blue rings consist of Canadian NAP1 genomes, QCD32g58, QCD-97b34, QCD-37x79 and QCD-66c26. The green is the susceptible CD26A54\_S while the red is the resistant subpopulation, CD26A54\_R. The outermost ring contains the sequences for the two transposable elements, Tn6104 and Tn6106 to confirm their absence in all genomes except R20291.

doi:10.1371/journal.pone.0053757.g004

among ribotype 027 strains has been reported previously (97.5% and 47.5% respectively), although no observations of metronidazole resistance or altered cell morphology were reported [15]. We have a few hypotheses with respect to our observations that CD26A54\_R did not produce spores by 48 hours whereas CD26A54\_S and VLOO13 both demonstrate an increasing proportion of spores. There are multiple methods in the literature to study sporulation of *C. difficile* isolates (reviewed in [64]). We did attempt this analysis with various media formulations and methods to shock the culture for spore selection, and although total numbers did vary across replicates and across individual experiments, we observed a consistent trend that no spores were ever counted in the CD26A54\_R culture up to 48 hours. Within the CD26A54\_R genome there is a point mutation in the stage 0 sporulation protein A gene (*spo0A*) which is a major regulator of

the sporulation process [65], as well as a nonsynonymous variant in the *cspC* gene which encodes a putative germination-specific protease. Further experimentation is needed to investigate whether this data demonstrates a lack or delay of spore production owing to disruption of the spore initiation pathway (via *spo0A* mutation) or conversely owing to disruption in the germination process resulting from the *cspC* mutation; causing the inability of spores to germinate efficiently. We speculate that disruption of the sporulation process could prolong the vegetative state resulting in prolonged expression of virulence factors during host infection. Importantly however, reduced propensity for spore generation and/or germination should render CD26A54\_R less transmissible in hospital or long-term care facility settings as vegetative cells are more susceptible to regular cleaning methods.



**Table 3.** Summary of genetic variation within coding regions relative to the reference R20291 genome unique to either CD26A54\_R or CD26A54\_S.

| R20291 Reference |          | CD26A54_R |           | CD26A54_S |           | Gene         | Predicted product                                 | PCR <sup>1</sup> | Coverage <sup>2</sup> | Frequency of             |
|------------------|----------|-----------|-----------|-----------|-----------|--------------|---------------------------------------------------|------------------|-----------------------|--------------------------|
| Position         | Sequence | Variant   | AA        | Variant   | AA        | name         |                                                   |                  |                       | variant (%) <sup>3</sup> |
| 920174           | A        | ATG       | Asn219fs  | –         | –         |              | putative transcription antiterminator             |                  | 150                   | 96                       |
| 969792           | T        | C         | SYN       | –         | –         |              | putative membrane protein                         | Y                | 295                   | 100                      |
| 1220387          | G        | A         | Val113Ile | –         | –         | <i>hom1</i>  | homoserine dehydrogenase                          |                  | 373                   | 93.3                     |
| 1268654          | C        | A         | Thr99Asn  | –         | –         | <i>spoOA</i> | stage 0 sporulation protein A                     | Y                | 170                   | 87.1                     |
| 1337528          | G        | A         | Ala30Thr  | –         | –         | <i>topA</i>  | DNA topoisomerase 1                               |                  | 225                   | 87.1                     |
| 1353228          | G        | A         | Glu41Lys  | –         | –         | <i>fur</i>   | ferric uptake regulation protein                  | Y                | 339                   | 100                      |
| 1481407          | T        | C         | SYN       | –         | –         |              | putative oligopeptide transporter                 |                  | 195                   | 88.2                     |
| 1487300          | G        | A         | Leu283Phe | –         | –         |              | GntR family transcription regulator               |                  | 85                    | 100                      |
| 1503742          | C        | A         | Asp254Tyr | –         | –         |              | putative signalling protein                       |                  | 340                   | 100                      |
| 1783253          | G        | A         | Asp593Asn | –         | –         |              | sodium ABC extrusion transporter permease         |                  | 181                   | 100                      |
| 1890570          | C        | T         | Ser328Phe | –         | –         | <i>thiH</i>  | thiamine biosynthesis protein                     | Y                | 325                   | 94.5                     |
| 2160266          | T        | G         | Ser308Ala | –         | –         |              | peptidase                                         |                  | 319                   | 100                      |
| 2516619          | T        | G         | Asp259Ala | –         | –         | <i>cspC</i>  | putative germination-specific protease            | Y                | 321                   | 99.4                     |
| 2759453          | T        | TA        | Tyr214fs  | –         | –         | <i>hemN</i>  | oxygen-independent coproporphyrinogen III oxidase | Y                | 179                   | 85.5                     |
| 2955260          | C        | T         | Ala229Thr | –         | –         | <i>glyC</i>  | glycerol-3-phosphate dehydrogenase (NAD(P)+)      |                  | 243                   | 64.6                     |
| 2995946          | G        | T         | Ala334Glu | –         | –         |              | pseudogene                                        |                  | 486                   | 52.7                     |
| 3014935          | C        | T         | Gly423Glu | –         | –         | <i>nifJ</i>  | pyruvate-flavodoxin oxidoreductase                | Y                | 362                   | 100                      |
| 3120023          | GT       | G         | Lys4fs    | –         | –         |              | putative N-acetylmuramoyl-L-alanine amidase       |                  | 295                   | 74.6                     |
| 3277693          | T        | C         | SYN       | –         | –         |              | altronate hydrolase                               |                  | 431                   | 95.1                     |
| 4159729          | G        | A         | Leu646Phe | –         | –         |              | diguanylate phosphodiesterase                     |                  | 125                   | 100                      |
| 2688508          | T        | –         | –         | A         | Leu701Ile |              | DNA topoisomerase                                 |                  | 338                   | 99.7                     |
| 3473445          | AT       | –         | –         | A         | Asp76fs   |              | GntR family transcriptional regulator             |                  | 183                   | 84.2                     |
| 4147900          | A        | –         | –         | G         | SYN       |              | hypothetical protein                              |                  | 270                   | 98.9                     |

<sup>1</sup>Wet lab confirmation of variant by sequenced PCR products using target specific primers.

<sup>2</sup>Fold coverage of Illumina sequences at this position.

<sup>3</sup>Frequency of the variant, presented as a percentage for comparison.

doi:10.1371/journal.pone.0053757.t003

In addition to the phenotypic and genotypic changes described above, we identified genetic mutations similar to those of other bacterial genera which have been shown to confer metronidazole resistance. The CD26A54\_R strain possesses a point mutation in the *fur* gene of which encodes the ferric uptake regulator, Fur. Disruption of the *fur* gene has been associated with metronidazole resistance in *H. pylori* by altering binding of Fur to superoxide dismutase thereby reducing oxidative stress within the cell [66]. Both CD26A54\_R and CD26A54\_S contain a frameshift mutation in the *rsbW* gene which encodes an anti-sigma factor

associated with  $\sigma^B$ , which plays a central role in stress responses [67]. We speculate that alteration of *rsbW* may similarly enhance the ability of the bacterium to reduce oxidative stress caused by metronidazole. Both strains also possess a frameshift mutation in a putative nitroreductase gene which may alter the requisite activation of metronidazole in the cell [59]. The association between nitroreductases and metronidazole resistance has been described previously for both *B. fragilis* and *H. pylori* [29,31,33–35].

As discussed above, there are numerous possible mechanisms to explain the metronidazole resistance observed in the current study.

**Table 4.** Variants within coding regions common to both CD26A54\_R and CD26A54\_S with reference to R20291.

| R20291 Reference |          | CD26A54_R & S |           | Gene        | Predicted product                                 | PCR <sup>1</sup> | Coverage <sup>2</sup> | Frequency                   |
|------------------|----------|---------------|-----------|-------------|---------------------------------------------------|------------------|-----------------------|-----------------------------|
| Position         | Sequence | Variant       | AA        | name        |                                                   |                  |                       | of variant (%) <sup>3</sup> |
| 6417             | G        | T             | Ala118Ser | <i>gyrA</i> | gyrase A                                          |                  | 457                   | 100                         |
| 9661             | C        | CA            | Ala71fs   | <i>rsbW</i> | anti-sigma factor protein                         |                  | 269                   | 91.5                        |
| 120932           | C        | A             | SYN       | <i>rpoA</i> | DNA directed RNA polymerase subunit A             |                  | 411                   | 99.8                        |
| 1116866          | G        | T             | Ala53Ser  |             | putative membrane protein (pseudogene)            |                  | 207                   | 100                         |
| 1568676          | C        | A             | Gln138Lys |             | ruberythrin                                       |                  | 486                   | 100                         |
| 1876233          | A        | C             | Val390Gly |             | putative arsenical pump membrane protein          |                  | 288                   | 100                         |
| 2134201          | A        | C             | Glu70Ala  |             | lipoprotein                                       |                  | 227                   | 100                         |
| 2297662          | T        | C             | Glu110Gly |             | putative lipid kinase                             |                  | 259                   | 99.2                        |
| 2297977          | A        | T             | Leu5Stp   |             | conserved hypothetical protein                    |                  | 300                   | 100                         |
| 2531178          | A        | G             | SYN       |             | PTS system, Elc component                         |                  | 323                   | 100                         |
| 2743315          | TA       | T             | Phe255fs  |             | ATP-dependent helicase                            |                  | 179                   | 92.7                        |
| 2840701          | C        | A             | Ser414Ile |             | membrane-associated 5'-nucleotidase               |                  | 286                   | 100                         |
| 2947240          | G        | T             | Ala217Glu |             | hypothetical protein                              |                  | 355                   | 100                         |
| 2955330          | A        | G             | SYN       | <i>glyC</i> | glycerol-3-phosphate dehydrogenase                |                  | 546                   | 100                         |
| 2976764          | G        | A             | Thr30Ile  | <i>murD</i> | UDP-N-acetylmuramoyl-L-alanine:D-glutamate ligase |                  | 250                   | 100                         |
| 3304975          | C        | T             | Glu72Lys  | <i>ntpC</i> | V-type ATP synthase subunit C                     |                  | 88                    | 100                         |
| 3437506          | T        | G             | SYN       |             | PTS system transporter subunit IIC                |                  | 274                   | 100                         |
| 3489680          | C        | A             | Met193Ile |             | PTS system transporter subunit IIBC               |                  | 508                   | 100                         |
| 3531583          | C        | T             | Val389Ile |             | PTS system transporter subunit IIABC              |                  | 245                   | 100                         |
| 3814691          | TC       | T             | Glu136fs  |             | putative nitroreductase                           | Y                | 184                   | 100                         |
| 3815543          | TG       | T             | Trp99fs   |             | transcriptional regulator                         |                  | 373                   | 91.7                        |
| 3832901          | T        | C             | SYN       |             | RNA methyltransferase                             |                  | 370                   | 99.2                        |
| 3913225          | A        | C             | SYN       |             | transposase                                       |                  | 30                    | 100                         |

<sup>1</sup>Wet lab confirmation of variant by sequenced PCR products using target specific primers.

<sup>2</sup>Fold coverage of Illumina sequences at this position.

<sup>3</sup>Frequency of the variant, presented as a percentage for comparison.

doi:10.1371/journal.pone.0053757.t004

In the literature there are multiple mechanisms for metronidazole resistance described within a species suggesting resistance can occur via different pathways and can be a multifactorial process. In the present study we presented phenotypic observations and

genomic analyses of a stable, metronidazole resistant isolate of *C. difficile* in the aim of providing a foundation for future experimental investigation to elucidate the mechanisms of resistance and

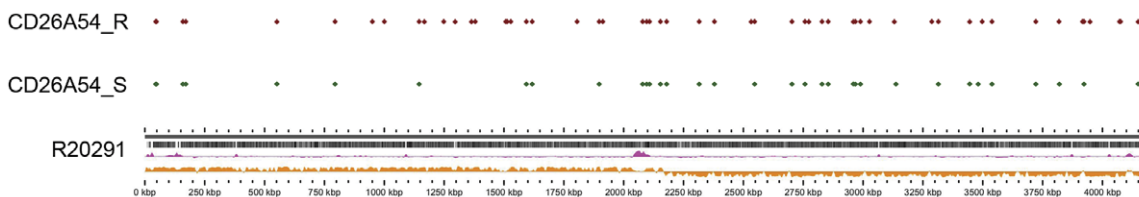

**Figure 5. Variant distribution of both CD26A54\_R and CD26A54\_S relative to the reference sequence R20291.** The total SNP and indel variants for the CD26A54\_R (red diamonds) and the CD26A54\_S (green diamonds) are plotted along the R20291 reference genome. The reference sequence tracks include CDS (black bars), GC content (pink peaks) and GC skew (orange peaks). doi:10.1371/journal.pone.0053757.g005

ultimately translate the knowledge to improve clinical diagnosis and treatment of CDI.

## Acknowledgments

We would like to acknowledge the National Science and Engineering Research Council of Canada's Visiting Fellowship in Canadian Government Laboratories Program; the Genomics, Bioinformatics and Media Core Facilities at the National Microbiology Laboratory for their expertise, hard work and technical support. Members of the Canadian Nosocomial Infection Surveillance Program are: David Boyd, National Microbiology Laboratory, Public Health Agency of Canada; Natalie Bridger, Eastern Health-HSC, St. John's, Nfld.; Elizabeth Bryce, Vancouver General Hospital, Vancouver, BC; John Conly, Foothills Medical Centre, Calgary, Alta.; André Dascal, SMBD-Jewish General Hospital, Montreal, Que.; Janice de Heer, Interior Health Authority, Kelowna, BC; John Embil, Health Sciences Centre, Winnipeg, Man.; Joanne Embree, Health Sciences Centre, Winnipeg, Man.; Gerald Evans, Kingston General Hospital, Kingston, Ont; Sarah Forgie, Stollery Children's Hospital, Edmonton, AB; Charles Frenette, McGill University Health Centre, Montreal, Que; David Haldane, Queen Elizabeth II Health Sciences Centre, Halifax, Nova Scotia; Gregory German, Queen Elizabeth Hospital, Charlottetown, PEI; George Golding, National Microbiology Laboratory, Public Health Agency of Canada; Denise Gravel, Centre for Communicable Diseases and Infection Control, Public Health Agency of Canada; Deanna Hembroff, University Hospital of Northern BC, Prince George, BC; Elizabeth Henderson, Alberta Health Services, Calgary, Alta.; Michael John, London Health Sciences Centre, London, Ont.; Lynn Johnston, Queen Elizabeth II Health Sciences Centre, Halifax, NS; Kevin

Katz, North York General Hospital, Toronto, ON; Pamela Kibsey, Victoria General Hospital, Victoria, BC; Magdalena Kuhn, South East Regional Health Authority, Moncton, NB; Joanne Langley, IWK Health Centre, Halifax, NS; Camille Lemieux, University Health Network, Toronto, Ont.; Nicole Le Saux, Children's Hospital of Eastern Ontario, Ottawa, ON; Mark Loeb, Hamilton Health Sciences Corporation, Hamilton, Ont.; Susan Richardson, Hospital for Sick Children, Toronto, Ont.; Allison McGeer, Mount Sinai Hospital, Toronto, Ont.; Dominik Mertz, Hamilton Health Sciences Corporation, Hamilton, Ont; Mark Miller, SMBD-Jewish General Hospital, Montreal, Que.; Robyn Mitchell, Centre for Communicable Diseases and Infection Control, Public Health Agency of Canada; Dorothy Moore, Montreal Children's Hospital, McGill University Health Centre, Montreal, Que.; Aboubakar Mouchili, Centre for Communicable Diseases and Infection Control, Public Health Agency of Canada; Michael Mulvey, National Microbiology Laboratory, Public Health Agency of Canada; Suzanne Pelletier, Health Sciences North, Sudbury, ON; Linda Pelude, Centre for Communicable Diseases and Infection Control, Public Health Agency of Canada; Caroline Quach, Montreal Children's Hospital, McGill University Health Centre, Montreal, Quebec; Virginia Roth, The Ottawa Hospital, Ottawa, Ont.

## Author Contributions

Conceived and designed the experiments: TL PC MRM JZ MRG. Performed the experiments: TL PC JZ DRB RH TD. Analyzed the data: TL MRM DRB RH TD PC MRG. Contributed reagents/materials/analysis tools: TL MRG MRM DRB TFB PK MM DG CNISP. Wrote the paper: TL.

## References

- Kyne L, Hamel MB, Polavaram R, Kelly CP (2002) Health care costs and mortality associated with nosocomial diarrhea due to *Clostridium difficile*. *Clinical Infectious Diseases* 34(3): 346–353. 20 March 2012.
- Johnson S, Samore MH, Farrow KA, Killgore GE, Tenover FC, et al. (1999) Epidemics of diarrhea caused by a clindamycin-resistant strain of *Clostridium difficile* in four hospitals. *N Engl J Med* 341(22): 1645–1651. 20 March 2012.
- Pepin J, Valiquette L, Alary ME, Villemure P, Pelletier A, et al. (2004) *Clostridium difficile*-associated diarrhea in a region of Quebec from 1991 to 2003: A changing pattern of disease severity. *CMAJ* 171(5): 466–472. 10.1503/cmaj.1041104.
- Gravel D, Miller M, Simor A, Taylor G, Gardam M, et al. (2009) Health care-associated *Clostridium difficile* infection in adults admitted to acute care hospitals in Canada: A Canadian nosocomial infection surveillance program study. *Clinical Infectious Diseases* 48(5): 568–576. 8 March 2012.
- McDonald LC, Killgore GE, Thompson A, Owens RC, Jr, Kazakova SV, et al. (2005) An epidemic, toxin gene-variant strain of *Clostridium difficile*. *N Engl J Med* 353(23): 2433–2441. 10.1056/NEJMoa051590.
- Anonymous (2005) Severe *Clostridium difficile*-associated disease in populations previously at low risk - four states, 2005. *Morb Mortal Weekly Rep* 54(47): 1201–1205. 20 March 2012.
- Cohen SH, Gerding DN, Johnson S, Kelly CP, Loo VG, et al. (2010) Clinical practice guidelines for *Clostridium difficile* infection in adults: 2010 update by the Society for Healthcare Epidemiology of America (SHEA) and the Infectious Diseases Society of America (IDSA). *Infection Control and Hospital Epidemiology* 31(5): 431–455. 13 March 2012.
- Bolton RP, Culshaw MA (1986) Faecal metronidazole concentrations during oral and intravenous therapy for antibiotic associated colitis due to *Clostridium difficile*. *Gut* 27(10): 1169–1172.
- Zar FA, Bakkanagari SR, Moorthi KM, Davis MB (2007) A comparison of vancomycin and metronidazole for the treatment of *Clostridium difficile*-associated diarrhea, stratified by disease severity. *Clin Infect Dis* 45(3): 302–307. 10.1086/519265.
- Sakka V, Tsiodras S, Galani L, Antoniadou A, Souli M, et al. (2008) Risk-factors and predictors of mortality in patients colonised with vancomycin-resistant enterococci. *Clinical Microbiology and Infection* 14(1): 14–21. 20 March 2012.
- Louie TJ, Miller MA, Mullane KM, Weiss K, Lentnek A, et al. (2011) Fidaxomicin versus vancomycin for *Clostridium difficile* infection. *N Engl J Med* 364(5): 422–431. 7 August 2012.
- Musher DM, Aslam S, Logan N, Nallacheru S, Bhaila I, et al. (2005) Relatively poor outcome after treatment of *Clostridium difficile* colitis with metronidazole. *Clin Infect Dis* 40(11): 1586–1590. 10.1086/430311.
- Barbut F, Richard A, Hamadi K, Chomette V, Burghoffer B, et al. (2000) Epidemiology of recurrences or reinfections of *Clostridium difficile*-associated diarrhea. *J Clin Microbiol* 38(6): 2386–2388.
- Spigaglia P, Barbanti F, Mastrantonio P, Ackermann G, Balmelli C, et al. (2011) Multidrug resistance in European *Clostridium difficile* clinical isolates. *J Antimicrob Chemother* 66(10): 2227–2234. 13 March 2012.
- Tenover FC, Tickler IA, Persing DH (2012) Antimicrobial resistant strains of *Clostridium difficile* from North America. *Antimicrob Agents Chemother*. 10.1128/AAC.00220-12.
- Oka K, Osaki T, Hanawa T, Kurata S, Okazaki M, et al. (2012) Molecular and microbiological characterization of *Clostridium difficile* isolates from single, relapse, and reinfection cases. *J Clin Microbiol* 50(3): 915–921. 10.1128/JCM.05588-11.
- Lin Y-, Huang Y-, Tsai P-, Lee T-, Lee N-, et al. (2011) Antimicrobial susceptibilities and molecular epidemiology of clinical isolates of *Clostridium difficile* in Taiwan. *Antimicrob Agents Chemother* 55(4): 1701–1705. 8 March 2012.
- Baines SD, O'Connor R, Freeman J, Fawley WN, Harmanus C, et al. (2008) Emergence of reduced susceptibility to metronidazole in *Clostridium difficile*. *J Antimicrob Chemother* 62(5): 1046–1052. 10.1093/jac/dkn313. 2 March 2012.
- Huang H, Weintraub A, Fang H, Nord CE (2009) Antimicrobial resistance in *Clostridium difficile*. *Int J Antimicrob Agents* 34(6): 516–522. 10.1016/j.ijantimicag.2009.09.012.
- Martin H, Willey B, Low DE, Staempfli HR, McGeer A, et al. (2008) Characterization of *Clostridium difficile* strains isolated from patients in Ontario, Canada, from 2004 to 2006. *J Clin Microbiol* 46(9): 2999–3004. 10.1128/JCM.02437-07.
- Peláez T, Sanchez R, Blazquez R, Catalan P, Munoz P, E. Bouza (4–7 October 1994) Metronidazole resistance in *Clostridium difficile*: A new emerging problem? Program and Abstracts of the 34th Interscience Conference on Antimicrobial Agents and Chemotherapy (ICAAC) Orlando, FL. (Abstract E-34:50).
- Peláez T, Alcalá L, Alonso R, Rodríguez-Crèixems M, García-Lechuz JM, et al. (2002) Reassessment of *Clostridium difficile* susceptibility to metronidazole and vancomycin. *Antimicrob Agents Chemother* 46(6): 1647–1650. 10.1128/AAC.46.6.1647-1650.2002. 2 March 2012.
- Peláez T, Cercenado E, Alcalá L, Marín M, Martín-López A, et al. (2008) Metronidazole resistance in *Clostridium difficile* isolates by PCR ribotyping and vancomycin. *Antimicrob Agents Chemother* 46(6): 1647–1650. 10.1128/AAC.46.6.1647-1650.2002. 2 March 2012.
- Indra A, Schmid D, Huhulescu S, Hell M, Gattringer R, et al. (2008) Characterization of clinical *Clostridium difficile* isolates by PCR ribotyping and detection of toxin genes in Austria, 2006–2007. *J Med Microbiol* 57(Pt 6): 702–708. 10.1099/jmm.0.47476-0.
- Albert TJ, Dailidene D, Dailide G, Norton JE, Kalia A, et al. (2005) Mutation discovery in bacterial genomes: Metronidazole resistance in *Helicobacter pylori*. *Nature Methods* 2(12): 951–953. 27 March 2012.
- Gal M, Brazier JS (2004) Metronidazole resistance in *Bacteroides* spp. carrying *nim* genes and the selection of slow-growing metronidazole-resistant mutants. *J Antimicrob Chemother* 54(1): 109–116. 27 March 2012.
- Kaakoush NO, Asencio C, Mégraud F, Mendz GL (2009) A redox basis for metronidazole resistance in *Helicobacter pylori*. *Antimicrob Agents Chemother* 53(5): 1884–1891. 10.1128/AAC.01449-08. 2 March 2012.

28. Steffens LS, Nicholson S, Paul LV, Nord CE, Patrick S, et al. (2010) *Bacteroides fragilis* RecA protein overexpression causes resistance to metronidazole. *Res Microbiol* 161(5): 346–354. 10.1016/j.resmic.2010.04.003.
29. Haggoud A, Reyssset G, Azeeddouh H, Sebald M (1994) Nucleotide sequence analysis of two 5-nitroimidazole resistance determinants from *Bacteroides* strains and of a new insertion sequence upstream of the two genes. *Antimicrob Agents Chemother* 38(5): 1047–1051. 27 March 2012.
30. Reyssset G, Haggoud A, Sebald M (1993) Genetics of resistance of bacteroides species to 5-nitroimidazole. *Clinical Infectious Diseases* 16(SUPPL. 4): S401–S403. 27 March 2012.
31. Reyssset G, Trinh S, Carlier J, Sebald M (1996) Genetic basis of 5-nitroimidazole resistance in *Bacteroides* spp. *Med Mal Infect* 26(SPEC. ISS. MAR.): 213–219. 27 March 2012.
32. Diniz CG, Farias LM, Carvalho MAR, Rocha ER, Smith CJ (2004) Differential gene expression in a *Bacteroides fragilis* metronidazole-resistant mutant. *J Antimicrob Chemother* 54(1): 100–108. 27 March 2012.
33. Jeong J, Mukhopadhyay AK, Dailidene D, Wang Y, Velapatino B, et al. (2000) Sequential inactivation of *rdxA* (hp0954) and *frxA* (HP0642) nitroreductase genes causes moderate and high-level metronidazole resistance in *Helicobacter pylori*. *J Bacteriol* 182(18): 5082–5090. 28 March 2012.
34. Sisson G, Jeong J, Goodwin A, Bryden L, Rossler N, et al. (2000) Metronidazole activation is mutagenic and causes DNA fragmentation in *Helicobacter pylori* and in *Escherichia coli* containing a cloned *H. pylori* *rdxA+* (nitroreductase) gene. *J Bacteriol* 182(18): 5091–5096. 28 March 2012.
35. Goodwin A, Kersulyte D, Sisson G, Veldhuyzen Van Zanten SJO, Berg DE, et al. (1998) Metronidazole resistance in *Helicobacter pylori* is due to null mutations in a gene (*rdxA*) that encodes an oxygen-insensitive NADPH nitroreductase. *Mol Microbiol* 28(2): 383–393. 15 July 2012.
36. Chang K, Ho S, Yang J, Wang J (1997) Isolation of a genetic locus associated with metronidazole resistance in *Helicobacter pylori*. *Biochem Biophys Res Commun* 236(3): 785–788. 7 August 2012.
37. Tsugawa H, Suzuki H, Muraoka H, Ikeda F, Hirata K, et al. (2011) Enhanced bacterial efflux system is the first step to the development of metronidazole resistance in *Helicobacter pylori*. *Biochem Biophys Res Commun* 404(2): 656–660. 27 March 2012.
38. Choi SS, Chivers PT, Berg DE (2011) Point mutations in *Helicobacter pylori*'s *fur* regulatory gene that alters resistance to metronidazole, a prodrug activated by chemical reduction. *PLoS One* 6(3): e18236. 10.1371/journal.pone.0018236.
39. Yuan L, Vogel A (2006) Evidence review: Communicable disease surveillance. Population Health and Wellness: BC Ministry of Health.
40. Miller M, Gravel D, Mulvey M, Taylor G, Boyd D, et al. (2010) Health care-associated *Clostridium difficile* infection in Canada: Patient age and infecting strain type are highly predictive of severe outcome and mortality. *Clinical Infectious Diseases* 50(2): 194–201. 13 March 2012.
41. Spigaglia P, Mastrantonio P (2004) Comparative analysis of *Clostridium difficile* clinical isolates belonging to different genetic lineages and time periods. *J Med Microbiol* 53(Pt 11): 1129–1136.
42. Lemece L, Dhalluin A, Testelin S, Mattrat MA, Maillard K, et al. (2004) Multiplex PCR targeting *tpi* (triose phosphate isomerase), *tcdA* (toxin A), and *tcdB* (toxin B) genes for toxigenic culture of *Clostridium difficile*. *J Clin Microbiol* 42(12): 5710–5714. 10.1128/JCM.42.12.5710-5714.2004.
43. Alfa MJ, Kabani A, Lyster D, Moncrief S, Neville LM, et al. (2000) Characterization of a toxin A-negative, toxin B-positive strain of *Clostridium difficile* responsible for a nosocomial outbreak of *Clostridium difficile*-associated diarrhea. *J Clin Microbiol* 38(7): 2706–2714.
44. Murray R, Boyd D, Levett PN, Mulvey MR, Alfa MJ (2009) Truncation in the *tcdC* region of the *Clostridium difficile* PathLoc of clinical isolates does not predict increased biological activity of toxin B or toxin A. *BMC Infectious Diseases* 9: 7 August 2012.
45. Abramoff MD, Magelhaes PJ, Ram SJ (2004) Image processing with ImageJ. *Biophotonics International* 11: 36.
46. Clinical and Laboratory Standards Institute (CLSI) (2007) Methods for antimicrobial susceptibility testing of anaerobic bacteria; approved standard—seventh edition, M11-A7.
47. Forgetta V, Oughton MT, Marquis P, Bruker I, Blanchette R, et al. (2011) Fourteen-genome comparison identifies DNA markers for severe-disease-associated strains of *Clostridium difficile*. *J Clin Microbiol* 49(6): 2230–2238. 13 March 2012.
48. Stabler RA, He M, Dawson L, Martin M, Valiente E, et al. (2009) Comparative genome and phenotypic analysis of *Clostridium difficile* 027 strains provides insight into the evolution of a hypervirulent bacterium. *Genome Biol* 10(9): 15 August 2012.
49. Bonfield JK, Smith K, Staden R (1995) A new DNA sequence assembly program. *Nucleic Acids Res* 23(24): 4992–4999.
50. Meyer F, Goesmann A, McHardy AC, Bartels D, Bekel T, et al. (2003) GenDB—an open source genome annotation system for prokaryote genomes. *Nucleic Acids Res* 31(8): 2187–2195.
51. Petkau A, Stuart-Edwards M, Stothard P, Van Domselaar G (2010) Interactive microbial genome visualization with GView. *Bioinformatics* 26(24): 3125–3126. 10.1093/bioinformatics/btq588.
52. Li H, Durbin R (2009) Fast and accurate short read alignment with burrows-wheeler transform. *Bioinformatics* 25(14): 1754–1760. 29 March 2012.
53. Li H, Handsaker B, Wysoker A, Fennell T, Ruan J, et al. (2009) The sequence Alignment/Map format and SAMtools. *Bioinformatics* 25(16): 2078–2079. 29 March 2012.
54. Danecek P, Auton A, Abecasis G, Albers CA, Banks E, et al. (2011) The variant call format and VCFtools. *Bioinformatics* 27(15): 2156–2158. 15 August 2012.
55. Spigaglia P, Mastrantonio P (2002) Molecular analysis of the pathogenicity locus and polymorphism in the putative negative regulator of toxin production (*TcdC*) among *Clostridium difficile* clinical isolates. *J Clin Microbiol* 40(9): 3470–3475. 22 March 2012.
56. Brouwer MS, Warburton PJ, Roberts AP, Mullany P, Allan E (2011) Genetic organisation, mobility and predicted functions of genes on integrated, mobile genetic elements in sequenced strains of *Clostridium difficile*. *PLoS One* 6(8): e23014. 10.1371/journal.pone.0023014.
57. Bourgault A, Lamothe F, Loo VG, Poirier L (2006) In vitro susceptibility of *Clostridium difficile* clinical isolates from a multi-institutional outbreak in southern Québec, Canada. *Antimicrob Agents Chemother* 50(10): 3473–3475. 29 March 2012.
58. Loo VG, Poirier L, Miller MA, Oughton M, Libman MD, et al. (2005) A predominantly clonal multi-institutional outbreak of *Clostridium difficile* - associated diarrhea with high morbidity and mortality. *N Engl J Med* 353(23): 2442–2449. 29 March 2012.
59. Edwards DI (1993) Nitroimidazole drugs - action and resistance mechanisms I. mechanisms of action. *J Antimicrob Chemother* 31(1): 9–20. 14 August 2012.
60. Proctor RA, von Eiff C, Kahl BC, Becker K, McNamara P, et al. (2006) Small colony variants: A pathogenic form of bacteria that facilitates persistent and recurrent infections. *Nature Reviews Microbiology* 4(4): 295–305. 13 July 2012.
61. Gröbner S, Beck J, Schaller M, Autenrieth IB, Schulte B (2012) Characterization of an *Enterococcus faecium* small-colony variant isolated from blood culture. *International Journal of Medical Microbiology* 302(1): 40–44. 14 August 2012.
62. Wellinghausen N, Chatterjee I, Berger A, Niederfuhr A, Proctor RA, et al. (2009) Characterization of clinical *Enterococcus faecalis* small-colony variants. *J Clin Microbiol* 47(9): 2802–2811. 14 August 2012.
63. Kahl BC, Belling G, Reichelt R, Herrmann M, Proctor RA, et al. (2003) Thymidine-dependent small-colony variants of *Staphylococcus aureus* exhibit gross morphological and ultrastructural changes consistent with impaired cell separation. *J Clin Microbiol* 41(1): 410–413. 13 July 2012.
64. Burns DA, Minton NP (2011) Sporulation studies in *Clostridium difficile*. *J Microbiol Methods* 87(2): 133–138. 14 August 2012.
65. Underwood S, Guan S, Vijayasubhash V, Baines SD, Graham L, et al. (2009) Characterization of the sporulation initiation pathway of *Clostridium difficile* and its role in toxin production. *J Bacteriol* 191(23): 7296–7305. 14 August 2012.
66. Tsugawa H, Suzuki H, Satoh K, Hirata K, Matsuzaki J, et al. (2011) Two amino acids mutation of ferric uptake regulator determines *Helicobacter pylori* resistance to metronidazole. *Antioxidants and Redox Signaling* 14(1): 15–23. 14 August 2012.
67. Helmann JD, Wu MFW, Gaballa A, Kobel PA, Morshedi MM, et al. (2003) The global transcriptional response of *Bacillus subtilis* to peroxide stress is coordinated by three transcription factors. *J Bacteriol* 185(1): 243–253. 14 August 2012.
